# Supplementary material for: A self-powered and reagent-less electrochemical aptasensor based on a DNA walker and tetraferrocene for the detection of aflatoxin B1
Source: Royal Society of Chemistry journal article supplement (doi:10.1039/d2ay01134d), 2022-01-01
Supplement: d2ay01134d1.pdf [file d2ay01134d1.pdf]

## Supporting Information

### **Self-powered and reagentless electrochemical aptasensor based on DNA walker and tetraferrocene for the detection of aflatoxin B1**

Hao Fan #, Mengqing Cheng #, Wenxing Zhang, Nian Hong, Guobing Wei, Ting Huang, Hanfeng Cui \*, Jing Zhang\*

# Contributed to this work equally

\* Corresponding Author

Department of Pharmacy, JiangXi University of Chinese Medicine, JiangXi 330004, China.

\* To whom correspondence should be addressed.

\* e-mail: cuihanfeng@126.com; 903827089@qq.com

# These authors contributed equally to this work.

**Keywords:** DNA walker; DNAzyme; Reagentless; UIO-66 (Zr)-(COOH)<sub>2</sub>; AFB1

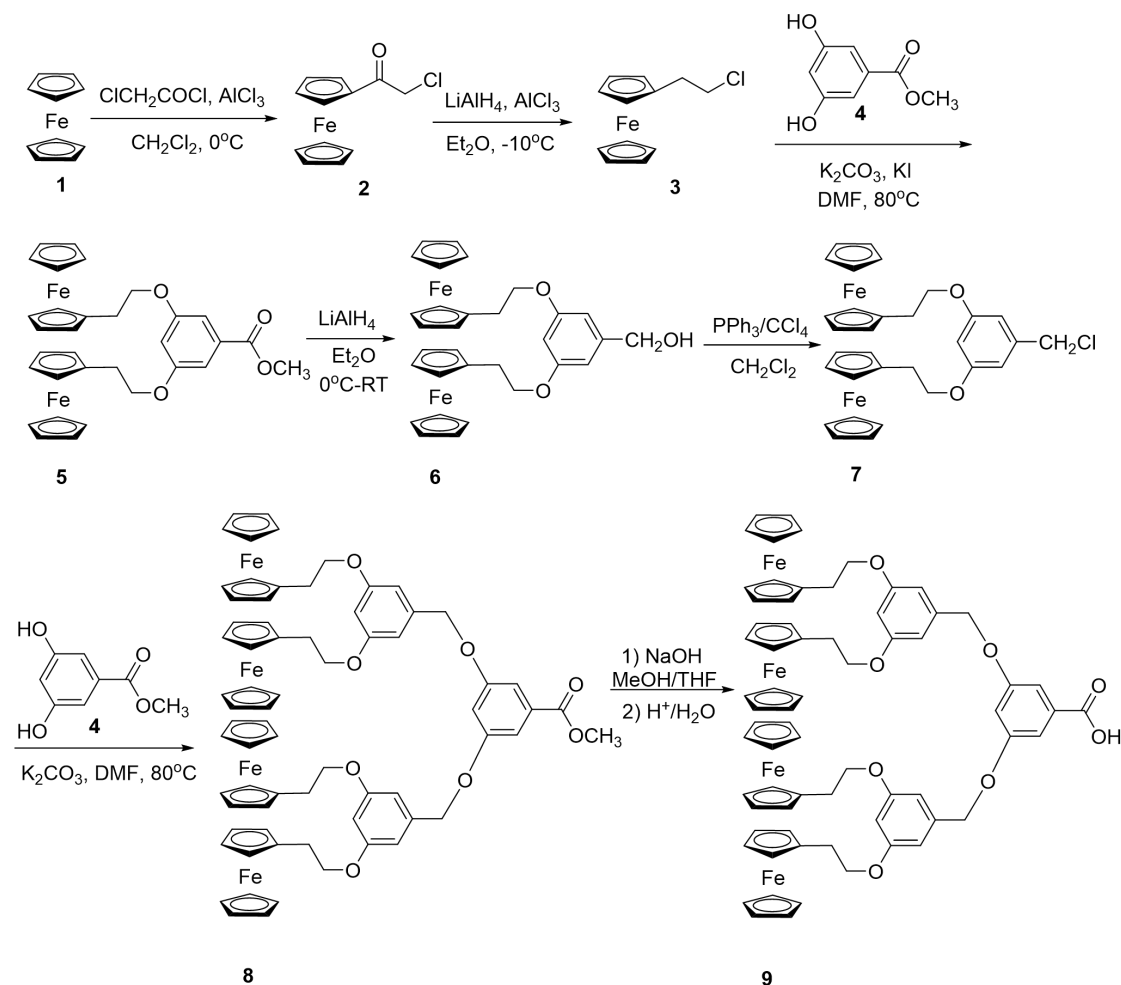

**Figure 1** Procedure for the synthesis of 3, 5-bis(3, 5-bisferrocenethoxybenzyloxy)benzoic acid 9.

## 1. The Synthetic of 3, 5-bis(3, 5-bisferrocenethoxybenzyloxy)benzoic Acid (9)

### 1.1 Preparation of α-chloroacetylferrocene (2)

To a solution of ferrocene (11.2 g, 60 mmol) in dichloromethane (60 mL) at 0°C, a solution of chloroacetyl chloride (3.8 mL, 50 mmol) and anhydrous aluminum trichloride (6.6 g, 50 mmol) in dichloromethane (80 mL) was added dropwise. After stirred for 8 h at room temperature, brine (100 mL) was added. The organic phase was separated and washed by brine. The resulting solution was dried over anhydrous Na<sub>2</sub>SO<sub>4</sub>, filtered and concentrated in vacuum. The residue was purified by flash

column chromatography to give orange crystal in 41.5% yield.  $^1\text{H}$  NMR ( $\text{CDCl}_3$ , 600MHz):  $\delta$  4.88 (Cp-H, t,  $J = 2.0$  Hz, 2 H), 4.62 (Cp-H, t,  $J = 2.0$  Hz, 2 H), 4.46 ( $\text{CH}_2$ , s, 2 H), 4.25 (Cp-H, s, 5 H).

### 1.2 Preparation of 2-Chloroethylferrocene(3)

A solution of  $\alpha$ -chloroacetylferrocene 2 (1.2 g, 4.58 mmol) in  $\text{Et}_2\text{O}$  (120 mL) was added dropwise to a solution of  $\text{LiAlH}_4$  (180 mg, 4.7 mmol) and  $\text{AlCl}_3$  (609 mg, 4.58 mmol) in  $\text{Et}_2\text{O}$  (90 mL) at  $-10^\circ\text{C}$ . After 1 h, the reaction was carefully quenched by addition of  $\text{H}_2\text{O}$  (20 mL) and diluted with brine (100 mL). The aqueous layer was extracted with ethyl acetate ( $3 \times 50$  mL). The combined organic layer was washed with brine ( $3 \times 50$  mL), dried over anhydrous sodium sulfate, and concentrated. The residue was purified by a silica gel column with ethyl acetate- Petroleum ether (1:15) as the eluent to afford yellow product 3 (0.76 g, 67%).  $^1\text{H}$  NMR ( $\text{CDCl}_3$ , 600 MHz)  $\delta$  4.16 (Cp-H, s, 7H), 4.13 (Cp-H, s, 2H), 3.62 ( $\text{CH}_2\text{-O}$ , t,  $J = 7.2$  Hz, 2H), 2.84 (Fc- $\text{CH}_2$ -, t,  $J = 7.2$  Hz, 2H).

### 1.3 Preparation of Methyl 3,5-bisferrocenethoxybenzoate (5)

2-Chloroethylferrocene 3 (548.1 mg, 2.21 mmol), methyl 3,5-dihydroxybenzoate 4 (154.6 mg, 0.92 mmol), anhydrous potassium carbonate (552 mg, 4 mmol) and potassium iodide (10 mg, 0.06 mmol) in DMF (4 mL) was mixed together and stirred at  $80^\circ\text{C}$  until disappearance of starting material was observed by TLC. The mixture was diluted with ethyl acetate (80 mL) and washed with water ( $3 \times 30$  mL) and brine ( $3 \times 30$  mL). The organic phase was dried over anhydrous sodium sulfate and the solvent was removed in vacuum. The residue was purified by a silica gel column with ethyl acetate-petroleum ether as the eluent to gave 5 as yellow solid (398 mg, 73%).  $^1\text{H}$  NMR ( $\text{CDCl}_3$ , 600 MHz)  $\delta$  7.19 (Ar-H, s, 1H), 7.11 (Ar-H, d,  $J = 2.4$  Hz, 2H), 4.09 (Cp-H, t,  $J = 1.5$  Hz, 4H), 4.06 (Cp-H, s, 10H), 4.04-4.02 (Cp-H, - $\text{CH}_2\text{-O}$ , m, 8H), 3.82 (O- $\text{CH}_3$ , s, 3H), 2.75 (Fc- $\text{CH}_2$ -, t,  $J = 7.2$  Hz, 4H).  $^{13}\text{C}$  NMR ( $\text{CDCl}_3$ , 150 MHz)  $\delta$  166.9, 159.9, 131.9, 107.7, 106.8, 84.6, 68.8, 68.6, 68.6, 67.5, 52.3, 29.5. HRMS (ESI) Calcd. for  $\text{C}_{32}\text{H}_{32}\text{Fe}_2\text{O}_4$   $[\text{M}]^+$ : 592.0999; found 592.0991.

#### 1.4 Preparation of (3, 5-bisferrocenethoxyphenyl)methanol (6)

To a solution of  $\text{LiAlH}_4$  (28.8 mg, 0.76 mmol) in anhydrous ether (10 mL), a solution of methyl 3, 5-bisferrocenethoxy- benzoate 5 (50 mg, 0.084 mmol) in anhydrous ether (15 mL) was added dropwise at  $0^\circ\text{C}$ . The mixture was stirred at room temperature until the disappearance of the starting material. And then the reaction was carefully quenched by  $\text{H}_2\text{O}$  (20 mL), the aqueous layer was separated and extracted with diethyl ether ( $3 \times 25$  mL). The combined organic layer was washed with brine ( $3 \times 50$  mL), dried over anhydrous sodium sulfate, and concentrated. The residue was purified by flash column chromatography to give orange crystal 6. Yields: 89.0%.  $^1\text{H}$  NMR ( $\text{CDCl}_3$ , 600 MHz)  $\delta$  6.55 (Ar-H, s, 2H), 6.43 (Ar-H, s, 1H), 4.64 (ArCH<sub>2</sub>-O, s, 2H), 4.20-4.13 (Cp-H, m, 18H), 4.10 (-CH<sub>2</sub>-O, t,  $J = 7.2$  Hz, 4H), 2.84 (Fc-CH<sub>2</sub>-, t,  $J = 7.2$  Hz, 4H). HRMS (ESI) Calcd. for  $\text{C}_{31}\text{H}_{32}\text{Fe}_2\text{O}_3$   $[\text{M}]^+$ : 564.1050; found 564.1037.

#### 1.5 Preparation of 3, 5-bisferrocenethoxybenzyl chloride (7)

To a solution of  $\text{PPh}_3$  (0.4313 g, 1.65 mmol) in  $\text{CCl}_4$  (10 mL), a solution of (3, 5-bisferrocenethoxyphenyl) methanol 6 (0.7739 g, 1.37 mmol) in  $\text{CH}_2\text{Cl}_2$  (10 mL) was added dropwise. The mixture solution was refluxed for 30 min and observed by TLC. The mixture was diluted with dichloromethane (40 mL) and washed with water ( $3 \times 20$  mL) and brine ( $3 \times 20$  mL). The organic phase was dried over anhydrous sodium sulfate and concentrated. The residue was purified by a silica gel column with ethyl acetate-petroleum ether as the eluent to gave 7 as dark orange solid.  $^1\text{H}$  NMR ( $\text{CDCl}_3$ , 600 MHz)  $\delta$  6.55 (Ar-H, d,  $J = 1.8$  Hz, 2H), 6.43 (Ar-H, t,  $J = 2.4$  Hz, 1H), 4.53 (ArCH<sub>2</sub>-O, s, 2H), 4.18 (Cp-H, t,  $J = 1.8$  Hz, 4H), 4.15 (Cp-H, s, 10H), 4.11 (Cp-H, t,  $J = 1.8$  Hz, 4H), 4.09 (-CH<sub>2</sub>-O, t,  $J = 7.2$  Hz, 4H), 2.83 (Fc-CH<sub>2</sub>-, t,  $J = 7.2$  Hz, 4H).  $^{13}\text{C}$  NMR ( $\text{CDCl}_3$ , 150 MHz)  $\delta$  160.3, 139.5, 107.1, 101.3, 84.6, 68.7, 68.6, 68.6, 67.5, 46.2, 29.2. HRMS (ESI) Calcd. for  $\text{C}_{31}\text{H}_{31}\text{ClFe}_2\text{O}_2$   $[\text{M}]^+$ : 582.0711; found 582.0731.

#### 1.6 Preparation of Methyl 3, 5-bis(3, 5-bisferrocenethoxybenzyloxy)benzoate (8)

To a solution of methyl 3,5-dihydroxybenzoate 4 (6.6 mg, 0.039 mmol) and anhydrous  $\text{K}_2\text{CO}_3$  (21.5 mg, 0.156 mmol) in 10 mL of DMF, s3,

5-bisferrocenethoxybenzyl chloride **7** (50 mg, 0.085 mmol) was added. The reaction was stirred at 80 °C under nitrogen atmosphere and observed by TLC. The mixture was diluted with ethyl acetate (30 mL) and washed with brine (3×15 mL). The organic phase was dried over anhydrous sodium sulfate and the solvent was removed in vacuum. The residue was purified by a silica gel column with ethyl acetate-petroleum ether as the eluent to give **8** as dark yellow solid. <sup>1</sup>H NMR (CDCl<sub>3</sub>, 600 MHz) δ 7.30 (Ar-H, d, J = 2.4 Hz, 2H), 6.82 (Ar-H, t, J = 2.4 Hz, 1H), 6.59 (Ar-H, d, J = 2.4 Hz, 4H), 6.45 (Ar-H, t, J = 2.4 Hz, 2H), 5.01 (ArCH<sub>2</sub>-O, s, 4H), 4.18 (Cp-H, t, J = 1.2 Hz, 8H), 4.15-4.09 (Cp-H and -CH<sub>2</sub>-O, m, 36H), 3.91 (-COOCH<sub>3</sub>, s, 3H), 2.83 (Fc-CH<sub>2</sub>-, t, J = 7.2 Hz, 8H).

### 1.7 Preparation of **3, 5-bis(3, 5-bisferrocenethoxybenzyloxy)benzoic acid (9)**

To a solution of methyl 3, 5-bis(3, 5-bisferrocenethoxybenzyloxy)benzoate **8** (50 mg, 0.04 mmol) in THF/MeOH (10mL, v/v = 1: 1) was added 10% aqueous sodium hydroxide (2 mL) at room temperature. The mixture was kept stirring overnight, the pH was adjusted to about 5 with dilute hydrochloric acid. The resulting orange crystals were collected by filtration, washed with water, and dried under vacuum. A pure sample was obtained by recrystallization from dichloromethane/ petroleum ether to give **9** (32 mg, 65% yield, purity > 95%) as dark yellow solid. <sup>1</sup>H NMR (CDCl<sub>3</sub>, 600 MHz) δ 7.32 (Ar-H, s, 2H), 6.85 (Ar-H, s, 1H), 6.59 (Ar-H, s, 4H), 6.44 (Ar-H, s, 2H), 5.01 (ArCH<sub>2</sub>-O, s, 4H), 4.20-4.11 (Cp-H, m, 36H), 4.09 (-CH<sub>2</sub>-O, t, J = 7.2 Hz, 8H), 2.83 (Fc-CH<sub>2</sub>-, t, J = 6.6 Hz, 8H). HRMS (ESI) Calcd. for C<sub>69</sub>H<sub>66</sub>Fe<sub>4</sub>O<sub>8</sub> [M]<sup>+</sup>: 1246.2155; found 1246.2091

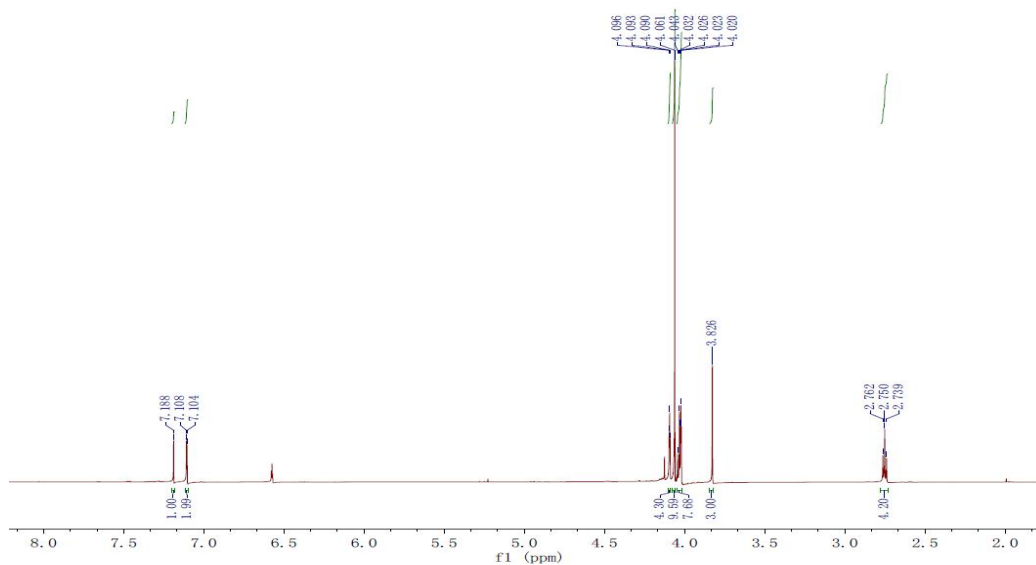

<sup>1</sup>H NMR of methyl 3,5-bisferrocenethoxybenzoate **5**

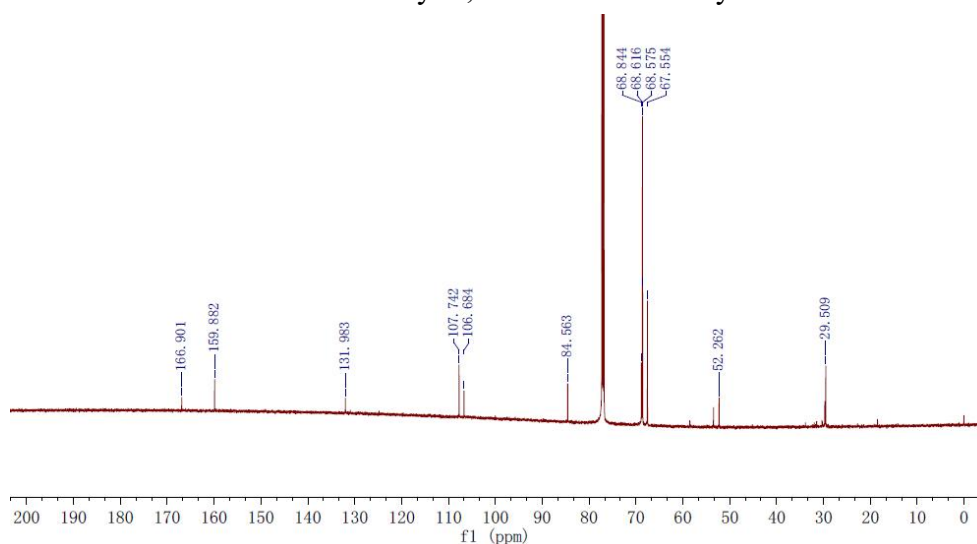

<sup>13</sup>C NMR of methyl 3,5-bisferrocenethoxybenzoate **5**

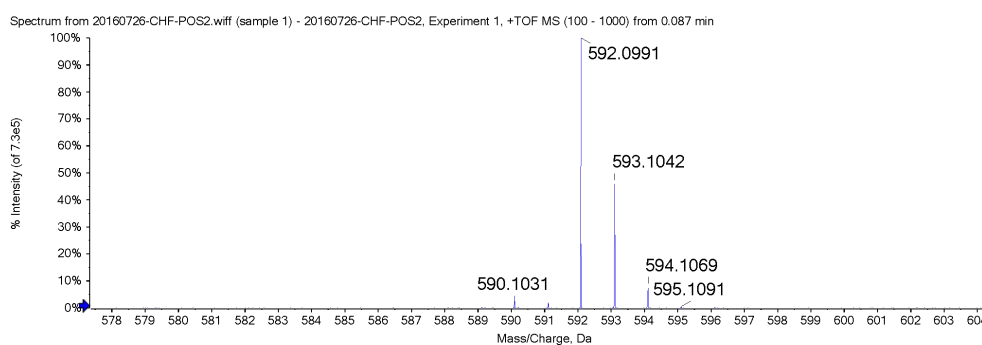

HRMS of methyl 3,5-bisferrocenethoxybenzoate **5**

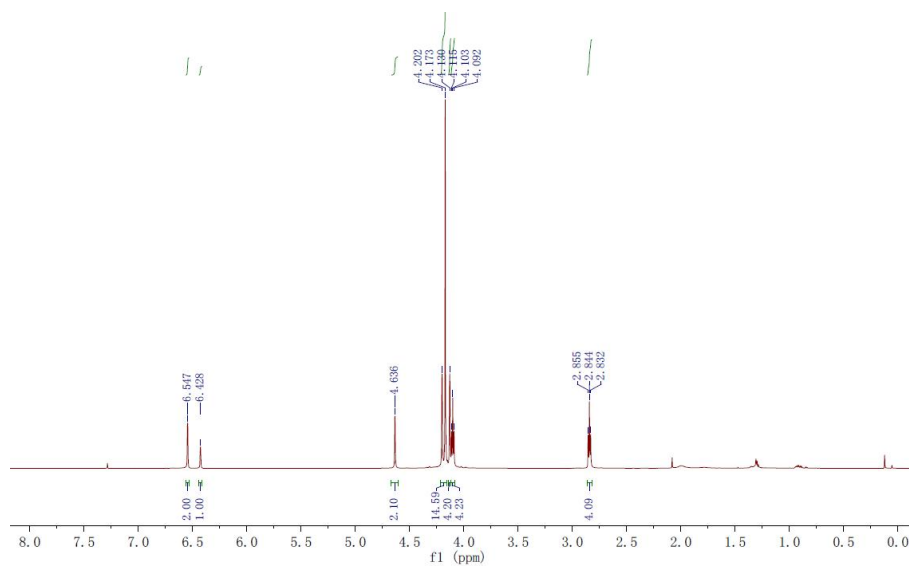

<sup>1</sup>H NMR of (3, 5-bisferrocenethoxyphenyl)methanol **6**

Spectrum from 20161215-POS-H161209-1.wiff (samp...m 0.104 min, noise filtered, Gaussian smoothed)

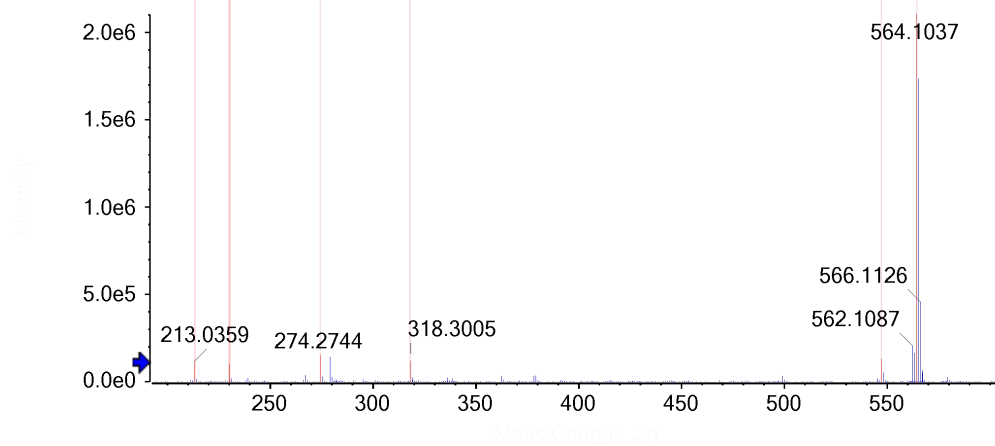

HRMS of (3, 5-bisferrocenethoxyphenyl)methanol **6**

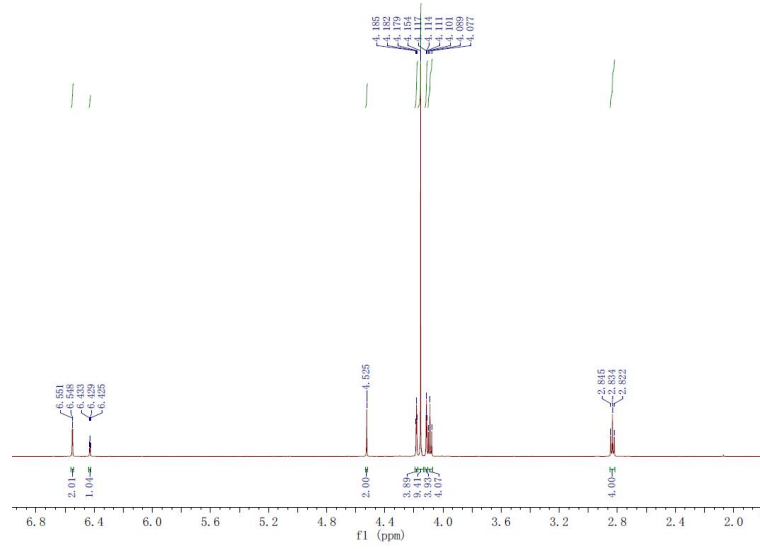

<sup>1</sup>H NMR of 3, 5-bisferrocenethoxybenzyl chloride 7

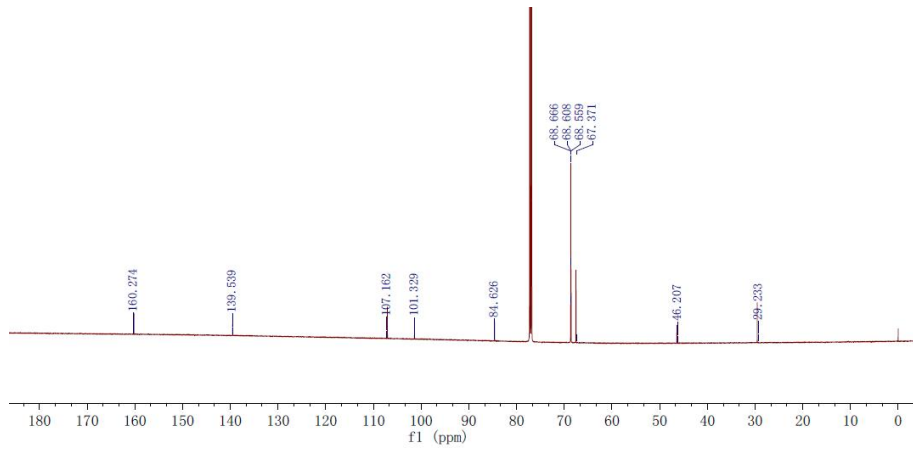

<sup>13</sup>C NMR of 3, 5-bisferrocenethoxybenzyl chloride 7

Spectrum from 20170418-POS-H170414.wif..., +TOF MS (100 - 3000) from 0.101 min

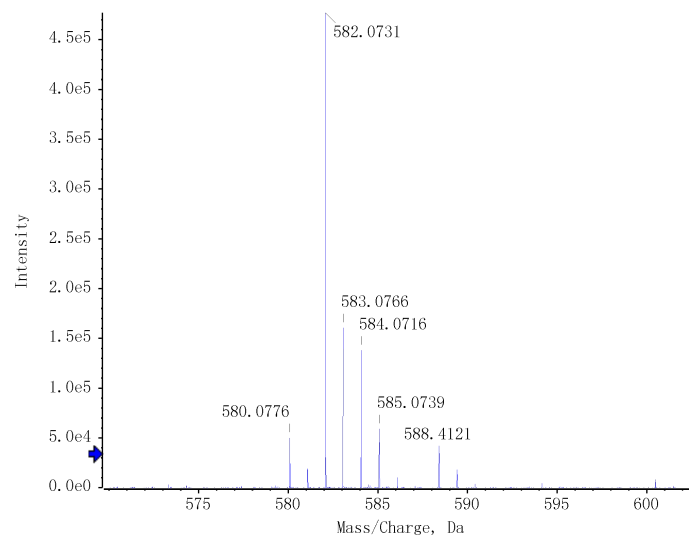



### HRMS of 3, 5-bisferrocenethoxybenzyl chloride 7

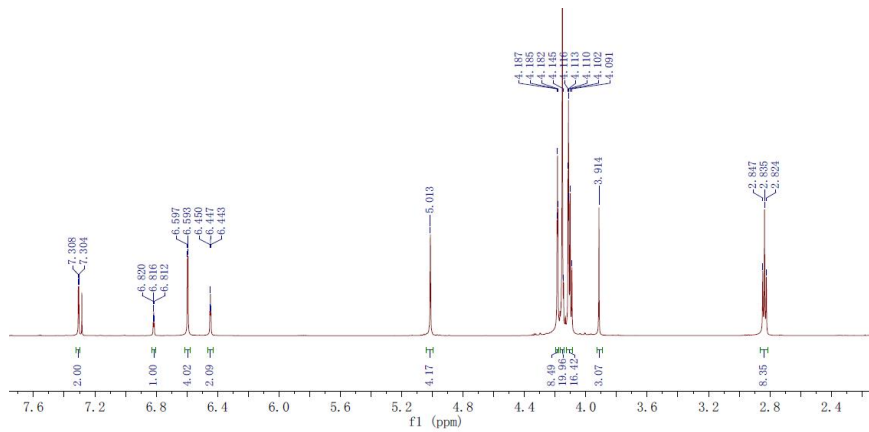

### <sup>1</sup>H NMR of methyl 3, 5-bis(3, 5-bisferrocenethoxybenzyloxy)benzoate 8

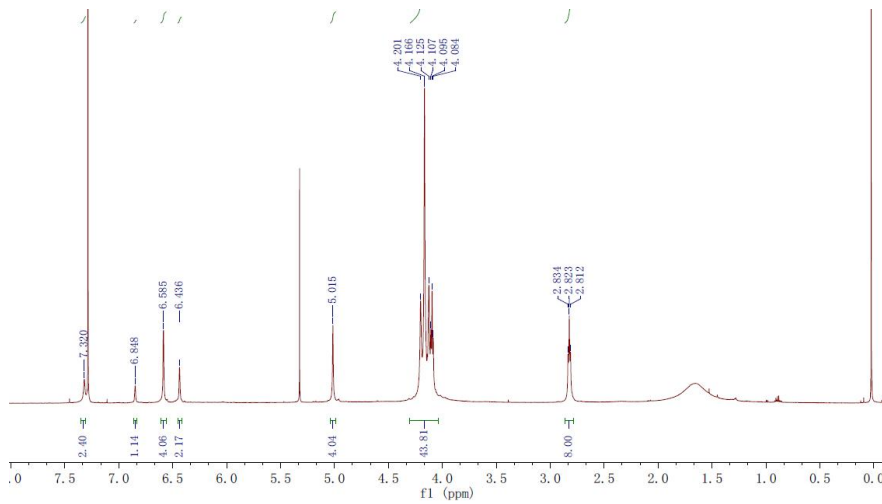

### <sup>1</sup>H NMR of 3, 5-bis(3, 5-bisferrocenethoxybenzyloxy)benzoic acid 9

## 2. Synthesis of Mn<sup>2+</sup>@UiO-66(Zr)-(COOH)<sub>2</sub>

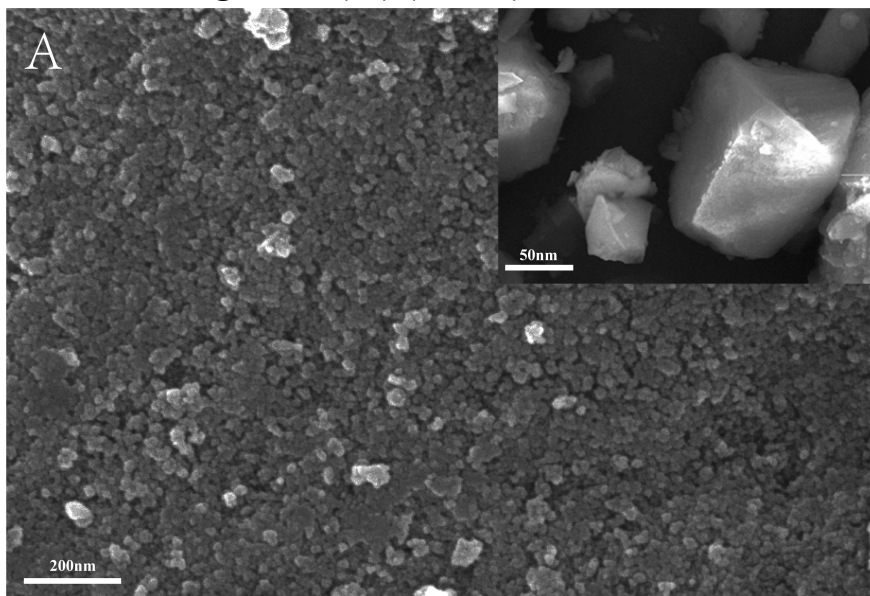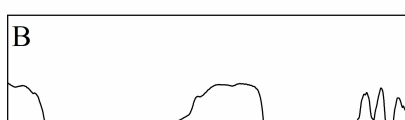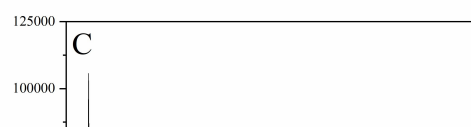

**Fig.S1.** (A) SEM images of as synthesized a UiO-66(Zr)-(COOH)<sub>2</sub>. (B) FTIR spectrum of UiO-66(Zr)-(COOH)<sub>2</sub>. (C) EDS characterization of Mn<sup>2+</sup>@UiO-66(Zr)-(COOH)<sub>2</sub>.

### 3. Analytical performance of the electrochemical aptasensor for AFB1

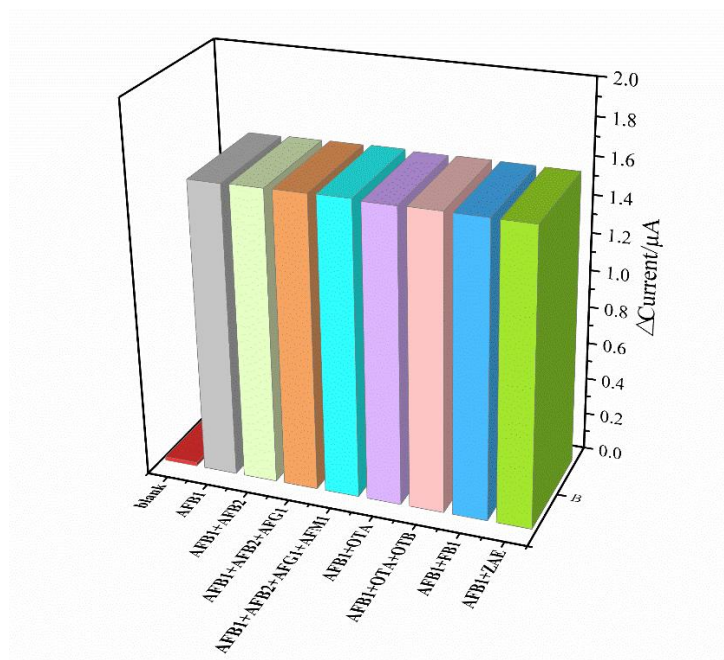

**Fig.S2.** Specificity experiments of E-AB sensor for AFB1 detection. Interfering substances include AFB1+AFB2, AFB1+AFB2+AFG1, AFB1+AFB2+AFG1+AFM1, AFB1+OTA, AFB1+OTA+OTB, AFB1+FB1 and AFB1+ZAE
